# Supplementary material for: De novo mutations in FBRSL1 cause a novel recognizable malformation and intellectual disability syndrome
Source: PubMed Central journal article supplement (PMC7519918; doi:10.1007/s00439-020-02175-x), 2020-05-18

# Suppl. Figure 1

A

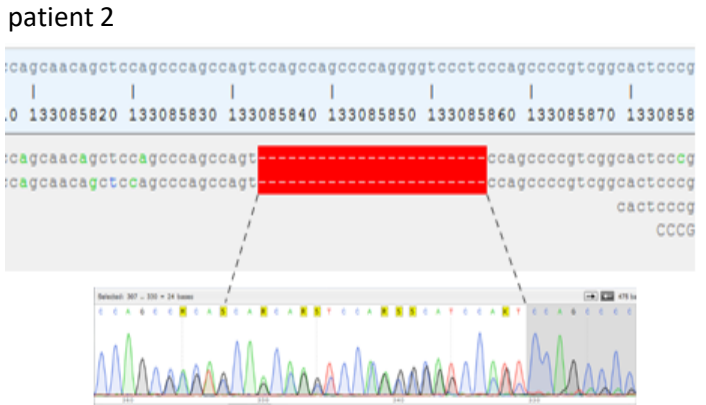

mother

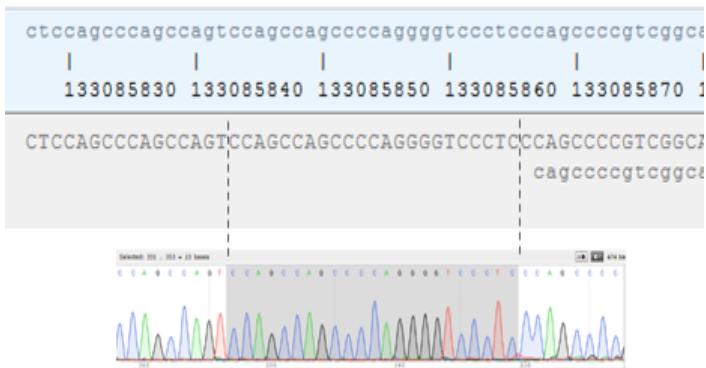

father

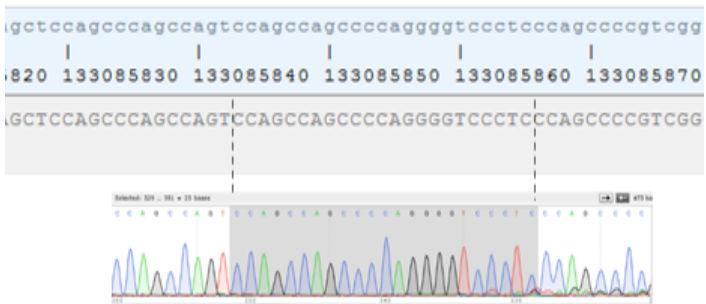

B

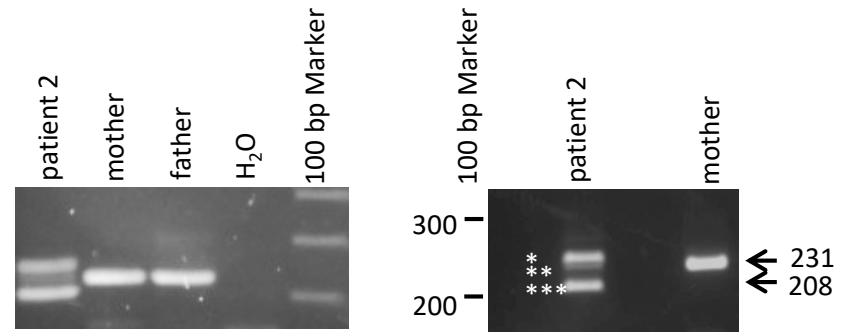

C

Sequences patient 2: \*  
Heteroduplex  
Wildtype/c.581\_603del

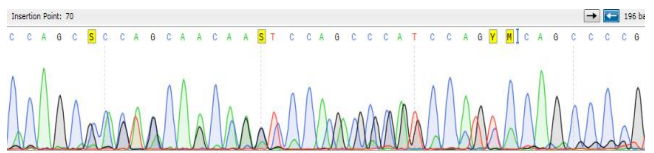

Sequences patient 2: \*\*  
Wildtype

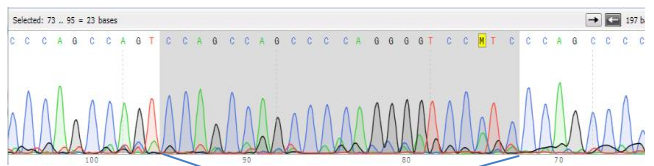

Sequences patient 2: \*\*\*  
c.581\_603del

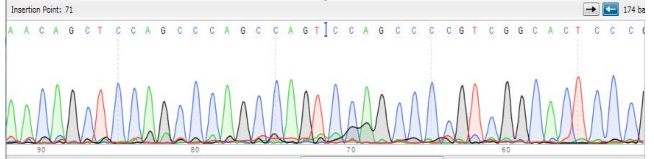

Sequences mother  
Wildtype

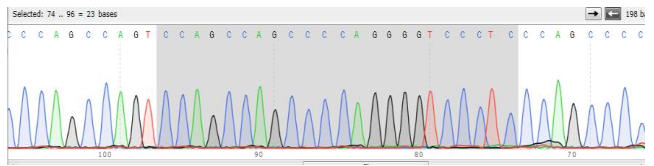

Supplement: 439_2020_2175_MOESM1_ESM.pdf [file 439_2020_2175_MOESM1_ESM.pdf]
