# Supplementary material for: De novo mutations in FBRSL1 cause a novel recognizable malformation and intellectual disability syndrome
Source: Springer Nature journal article supplement (doi:10.1007/s00439-020-02175-x), 2020-05-18

# Suppl. Figure 2

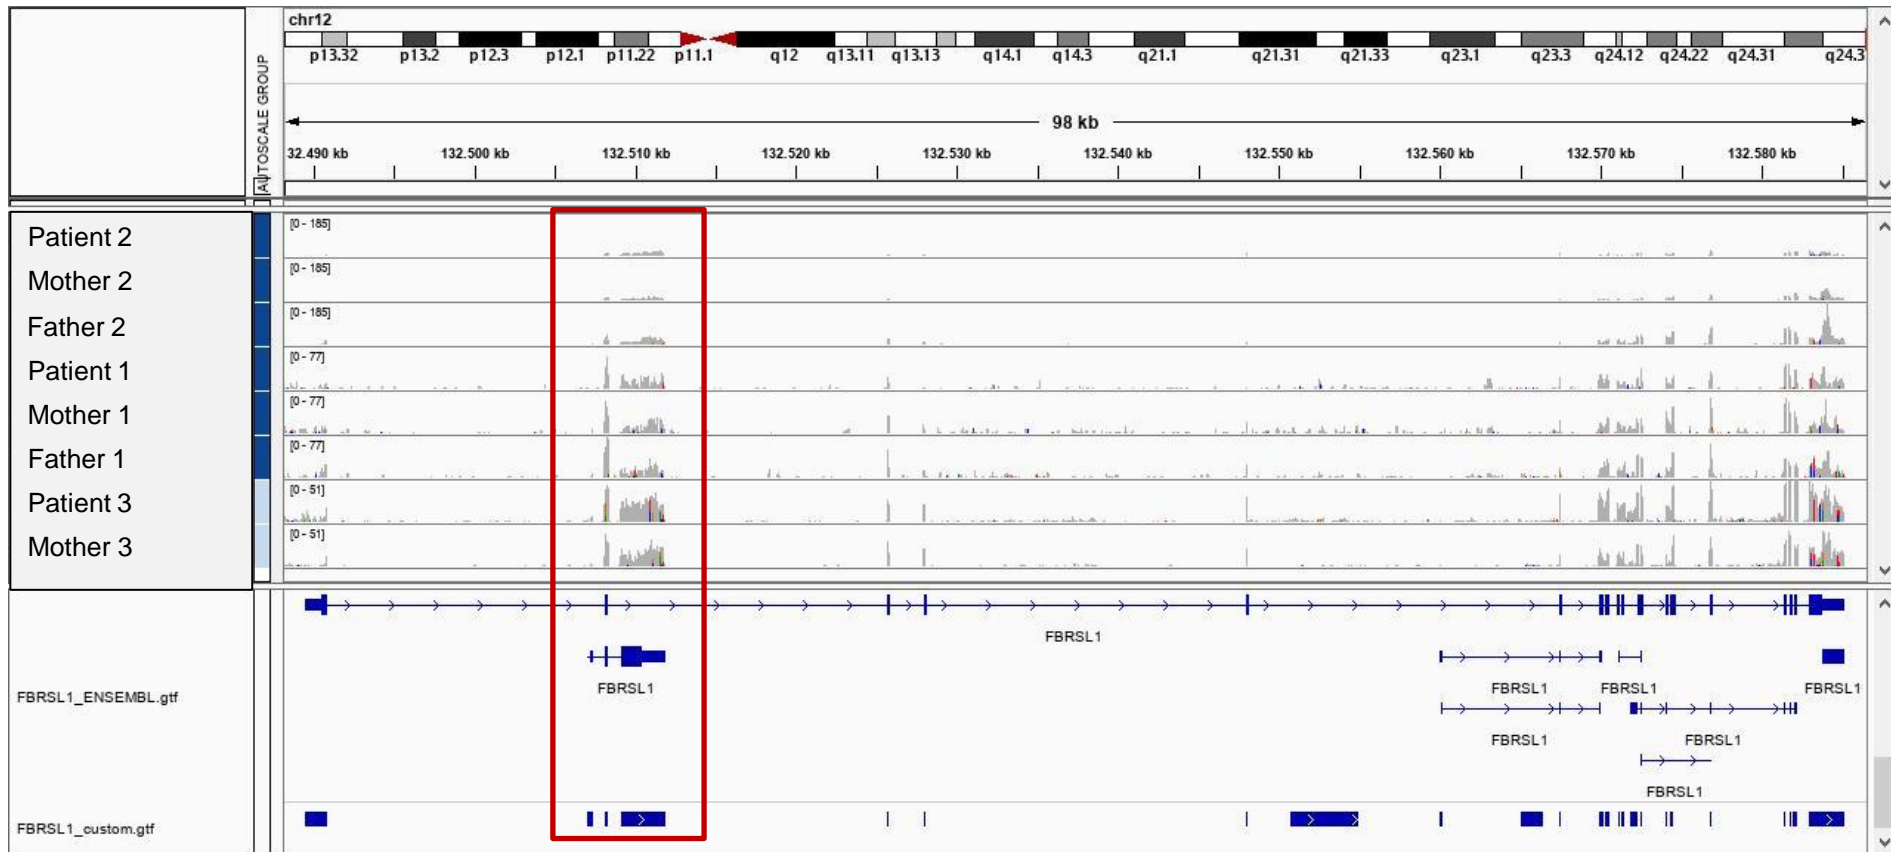

Supplement: MOESM2 [file 439_2020_2175_MOESM2_ESM.pdf]
