# Supplementary material for: De novo mutations in FBRSL1 cause a novel recognizable malformation and intellectual disability syndrome
Source: Springer Nature journal article supplement (doi:10.1007/s00439-020-02175-x), 2020-05-18
Supplement: MOESM4 [file 439_2020_2175_MOESM4_ESM.pdf]

# Suppl. Figure 4

**A**

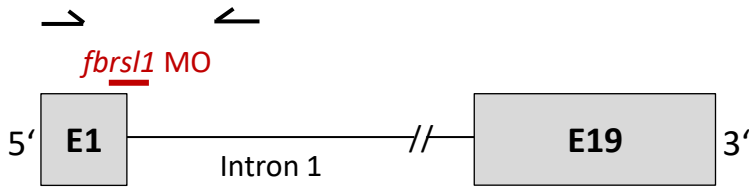

**B**

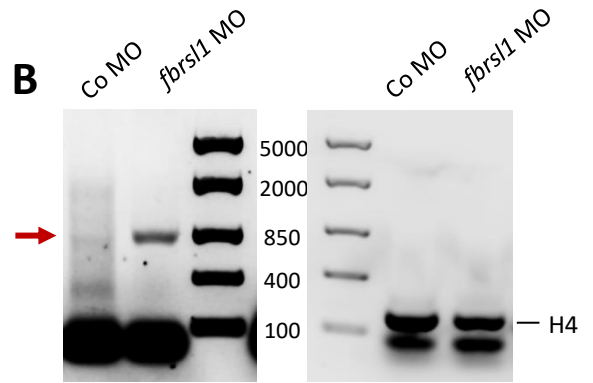

**C**

```

RT-PCR product FBRSL1 1 ATGGATATTTAAACCAAAACAACCAAGCAGGCGTTCCCGGTCCTCCAAAGGGATAGGGTGAGGAGGAGAGATCCTTCTGTCCGAGATCCACGAAACCAGAGCC 100
1 ATGGATATTTAAACCAAAACAACCAAGCAGGCGTTCCCGGTCCTCCAAAGGGATAGGGTGAGGAGGAGAGATCCTTCTGTCCGAGATCCACGAAACCAGAGCC 100
Exon1
RT-PCR product FBRSL1 101 CATCCTCTGGTTCAGAGGTAGAAGGGGCTTGGGGAAGGAAAATTCGAACCAGAATGGCACAAATGTGAAAAATCCATCTGCTTTAACAGAAAATGCCAG 200
101 CATCCTCTGGTTCAGAGGTAGAAGGGGCTTGGGGAAGGAAAATTCGAACCAGAATGGCACAAATGGGAAAAATCCATCTGCTTTAACAGAAAATGCCAG 200
RT-PCR product FBRSL1 201 GCCGCCAGACGTAAGAGGAAAGAAATCTAGCTCACAGGAGGAGGATATAATTGACGGCTTTGCAATTGCCAGCTTCAATACCCCTGGAAGCCTTAGAGGTA 300
201 GCCGCCAGACGTAAGAGGAAAGAAATCTAGCTCACAGGAGGAGGATATAATTGACGGCTTTGCAATTGCCAGCTTCAATACCCCTGGAAGCCTTAGAGGTA 300
RT-PCR product FBRSL1 301 AGAGAGAGTTATATTATCTCTTTAATAATGGATTGTAGGATACTGCTTGTACTTGGTGACGTTTTAAGAATTTCACTTTCTGCAACTTCCCCTTACCC 400
301 AGAGAGAGTTATATTATCTCTTTAATAATGGATTGTAGGATACTGCTTGTACTTGGTGACGTTTTAAGAATTTCACTTTCTGCAACTTCCCCTTACCC 400
RT-PCR product FBRSL1 401 TCTGTCAAAGCAACATTTTGTGTTATGTCCAGTGTGTTTCATAGAATCACTCCAAGCATAGATGGTAGAATGTAAACAAAAATCCAAGGCATTGCAGTGG 500
401 TCTGTCAAAGCAACATTTTGTGTTATGTCCAGTGTGTTTCATAGAATCACTCCAAGCATAGATGGTAGAATGTAAACAAAAATCCAAGGCATTGCAGTGG 500
RT-PCR product FBRSL1 501 TGAGAAGGTGTAGTGTGCTAGTATTCATTAAGAGTGGTAAATATGGATTACCTTTCAACATTGATAGTAATATTGTAGAGCTTTGTGTCACAT 600
501 TGAGAAGGTGTAGTGTGCTAGTATTCATTAAGAGTGGTAAATATGGATTACCTTTCAACATTGATAGTAATATTGTAGAGCTTTGTGTCACAT 600
RT-PCR product FBRSL1 601 ATTTGCTCAGAAGAGATACACTGGTGTATTTTTATCTTTTTTGTGTTAAGATGATGTGTTTAGATCACCCCAATACTATATATAATAGCCTATATCCTATA 700
601 ATTTGCTCAGAAGAGATACACTGGTGTATTTTTATCTTTTTTGTGTTAAGATGATGTGTTTAGATCACCCCAATACTATATATAATAGCCTATATCCTATA 700
RT-PCR product FBRSL1 701 TATAAATAGGATATAGGCTATTAGATACAGTATGTATGTCTATCTATCTATATCTATATATATAGATATATAGATATATAGATATATAGATATATAGA 800
701 tataaataaggatataggctattagatacagtatgtatgtctatctatctatntnnnnnnnnnnnnnnnnnnnnnnnnnnnnnnnnnnnnnnnnnnnnnnnnnnnnnnnn 800
RT-PCR product FBRSL1 801 TATATAGATATATAGATAGATATATAGATAGATAGATAGATATAT - - - - AGATATAT - - AGATATATAGATATATAGATATA - - - - TAGATAT 887
801 NNNNNNNNNNNNNNNNNNNNNNNNNNNNNNNNNNNNNNNNNNNNNNNNNNNNNNNNNNNNNNNNNNNNNNNNNNNNNNNNNNNNNNNNNNNNNNNNNNNNN 900
RT-PCR product FBRSL1 888 ATATAGATATATATATATATAGATATATATATATATATATAtntAtatntanaTATCTATATATCTATaTATatgnaTAt - - - - - 967
901 NNNNNNNNNNNNNNNNNNNNNNNNNNNNNNNNNNNNNNNNNNNNNNNNNNNNNNNNNNNNNNGATATATATATATCTTTGTATAGGCAACAATCCGCTTCTTTT 994
    
```
